# Supplementary material
Source: PubMed Central journal article supplement (PMC6456520)
Supplement: ajtr0011-1711-f6.pdf [file ajtr0011-1711-f6.pdf]

# Exosomes in NSCLC

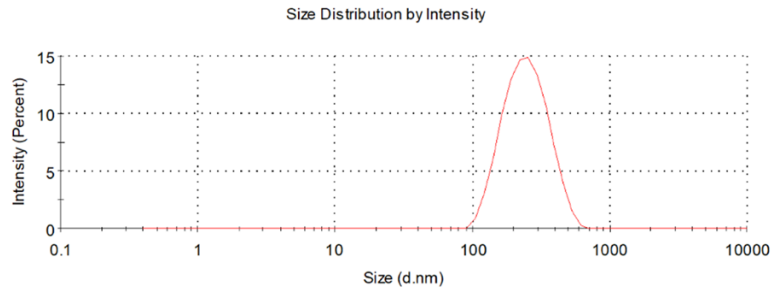

**Figure S1.** The distribution of A549 exosomes particle sizes. The distribution of the particle sizes of A549 exosomes was assessed by NTA. NTA, nanoparticle tracking analysis.
